# Supplementary material for: The impact of physical fitness, social life, and cognitive functions on work ability in middle-aged and older adults
Source: Springer Nature journal article supplement (doi:10.1007/s00420-022-01943-8), 2022-12-16
Supplement: MOESM1 [file 23836390]

## SUPPLEMENTARY FILES

The impact of physical fitness, social life, and cognitive functions on work ability in middle-aged and older adults

Jennifer A. Rieker, PhD<sup>1</sup>, Patrick D. Gajewski, PhD<sup>2</sup>, José Manuel Reales, PhD<sup>3</sup>, Soledad Ballesteros, PhD<sup>1</sup>, Klaus Golka, PhD<sup>2</sup>, Jan G. Hengstler, PhD<sup>2</sup>, Edmund Wascher, PhD<sup>2</sup>, Stephan Getzmann, PhD<sup>2</sup>

<sup>1</sup>Department of Basic Psychology II, Universidad Nacional de Educación a Distancia, Madrid, Spain

<sup>2</sup>Leibniz Research Centre for Working Environment and Human Factors at TU Dortmund (IfADo), Dortmund, Germany

<sup>3</sup>Department of Methodology for Behavioral Science, Universidad Nacional de Educación a Distancia, Madrid, Spain

\* Corresponding author:

Jennifer A. Rieker  
Department of Basic Psychology II,  
Universidad Nacional de Educación a Distancia,  
Juan del Rosal, 10, 28040 Madrid, Spain  
Email: jrieker@psi.uned.es

**Table S1.** Sociodemographic and lifestyle characteristics of the sample as a function of the WAI score.

| Characteristics                        | N (%)       | WAI (SD)   | F     | p     |
|----------------------------------------|-------------|------------|-------|-------|
| Age groups <sup>a</sup>                |             |            | 27.25 | <.001 |
| middle-aged adults                     | 247 (51.1%) | 40.7 (6.2) |       |       |
| older adults                           | 236 (48.9%) | 38.2 (5.3) |       |       |
| <b>Family and social relationships</b> |             |            |       |       |
| Marital status                         |             |            | < 1   | ns.   |
| single                                 | 36 (7.5%)   | 40.3 (5.1) |       |       |
| married                                | 181 (37.9%) | 39.4 (5.7) |       |       |
| partnership                            | 220 (46.0%) | 39.4 (5.4) |       |       |
| divorced                               | 35 (7.3%)   | 39.7 (5.1) |       |       |
| widowed                                | 6 (1.3%)    | 39.3 (4.1) |       |       |
| Living situation                       |             |            | 2.3   | ns.   |
| alone                                  | 102 (22.9%) | 39.4 (6.2) |       |       |
| with partner                           | 138 (31%)   | 39.5 (4.9) |       |       |
| with family                            | 154 (34.6%) | 38.9 (5.5) |       |       |
| with parents                           | 8 (1.8%)    | 43.2 (2.3) |       |       |
| with other persons                     | 43 (9.7%)   | 41.0 (4.6) |       |       |
| Children                               |             |            | 2.0   | ns.   |
| no                                     | 325 (67.6%) | 39.7 (5.3) |       |       |
| yes                                    | 156 (32.4%) | 38.9 (5.5) |       |       |
| Family pet                             |             |            | 4.3   | .039  |
| no                                     | 379 (78.8%) | 39.7 (5.2) |       |       |
| yes                                    | 102 (21.2%) | 38.5 (5.8) |       |       |
| Number of close friends                |             |            | 2.2   | ns.   |
| 1 - 3                                  | 97 (21.2%)  | 38.3 (5.6) |       |       |
| 4 - 7                                  | 222 (48.5%) | 39.4 (5.3) |       |       |
| 8 - 10                                 | 88 (19.2%)  | 40.9 (5.0) |       |       |
| more than 10                           | 51 (11.1%)  | 40.3 (5.0) |       |       |
| Frequency of friendship meetings       |             |            | 4.1   | .003  |
| once or twice per month                | 136 (28.5%) | 38.1 (5.7) |       |       |
| once per week                          | 140 (29.3%) | 39.4 (5.4) |       |       |
| twice per week                         | 110 (23%)   | 40.1 (4.9) |       |       |
| three times per week                   | 62 (13%)    | 41.1 (5.0) |       |       |
| more than three times per week         | 30 (6.3%)   | 40.5 (4.7) |       |       |
| <b>Nutrition and stimulants</b>        |             |            |       |       |
| Frequency of <i>fruit</i> consumption  |             |            | 1.35  | ns.   |
| several times a day                    | 79 (16.5%)  | 39.2 (5.4) |       |       |
| daily                                  | 182 (37.9%) | 40.0 (5.5) |       |       |
| one to four times per week             | 197 (41%)   | 39.2 (5.0) |       |       |
| once per month                         | 18 (3.8%)   | 38.1 (6.1) |       |       |
| never                                  | 4 (0.8%)    | 37.8 (5.9) |       |       |

|                                           |             |            |      |        |
|-------------------------------------------|-------------|------------|------|--------|
| Frequency of <i>vegetable</i> consumption |             |            | < 1  | ns.    |
| daily                                     | 70 (14.6%)  | 40.2 (5.6) |      |        |
| one to four times per week                | 218 (45.4%) | 39.7 (5.4) |      |        |
| once per month                            | 186 (38.8%) | 38.9 (5.2) |      |        |
| never                                     | 6 (1.3%)    | 38.0 (5.8) |      |        |
| Frequency of <i>wholemeal</i> consumption |             |            | < 1  | ns.    |
| several times a day                       | 36 (7.5%)   | 40.3 (5.1) |      |        |
| daily                                     | 181 (37.9%) | 39.4 (5.7) |      |        |
| one to four times per week                | 220 (46%)   | 39.4 (5.4) |      |        |
| once per month                            | 35 (7.3%)   | 39.7 (4.1) |      |        |
| never                                     | 6 (1.3%)    | 39.3 (4.1) |      |        |
| Frequency of <i>meat</i> consumption      |             |            | < 1  | ns.    |
| several times a day                       | 92 (19.2%)  | 39.5 (5.5) |      |        |
| daily                                     | 110 (23%)   | 39.8 (4.9) |      |        |
| one to four times per week                | 196 (40.9%) | 39.3 (5.5) |      |        |
| once per month                            | 28 (5.8%)   | 38.7 (5.9) |      |        |
| never                                     | 53 (11.9%)  | 39.7(5.3)  |      |        |
| Frequency of <i>fish</i> consumption      |             |            | 1.74 | ns.    |
| several times a day                       | 2 (12.3%)   | 46.0 (.0)  |      |        |
| daily                                     | 4 (39.3%)   | 41.7 (2.2) |      |        |
| one to four times per week                | 226 (46.8%) | 39.7 (5.3) |      |        |
| once per month                            | 190 (39.5%) | 38.0 (5.5) |      |        |
| never                                     | 59 (12.3%)  | 39.5 (5.3) |      |        |
| Frequency of <i>fast-food</i> consumption |             |            | 1.29 | ns.    |
| several times a day                       | 1 (.2%)     | 40.0 (.0)  |      |        |
| daily                                     | 3 (.6%)     | 38.6 (1.5) |      |        |
| one to four times per week                | 120 (25%)   | 39.1 (5.8) |      |        |
| once per month                            | 301 (62.7%) | 38.9 (5.6) |      |        |
| never                                     | 55 (11.5%)  | 40.6 (5.4) |      |        |
| Frequency of <i>alcohol</i> consumption   |             |            | 1.58 | ns.    |
| daily                                     | 24 (5%)     | 38.1 (6.0) |      |        |
| one to three times per week               | 171 (35.6%) | 39.0 (5.6) |      |        |
| one to three times per month              | 220 (45.8%) | 39.7 (5.3) |      |        |
| never                                     | 65 (13.5%)  | 40.3 (4.6) |      |        |
| Frequency of <i>smoking</i>               |             |            | < 1  | ns.    |
| more than 20 per day                      | 9 (1.9%)    | 37.9 (6.6) |      |        |
| 11 – 20 per day                           | 22 (4.6%)   | 40.0 (5.7) |      |        |
| 1 – 10 per day                            | 43 (9%)     | 40.2 (4.7) |      |        |
| not anymore                               | 103 (21.5%) | 39.4 (5.0) |      |        |
| never                                     | 302 (63%)   | 39.4 (5.5) |      |        |
| <b>Education and Lifestyle</b>            |             |            |      |        |
| Education                                 |             |            | 6.73 | <.0001 |
| university degree                         | 213 (44.5%) | 40.3 (5.1) |      |        |

|                                       |             |            |       |        |
|---------------------------------------|-------------|------------|-------|--------|
| high school diploma                   | 151 (31.5%) | 39.2 (5.2) |       |        |
| secondary                             | 94 (19.6%)  | 37.5 (5.6) |       |        |
| primary                               | 21 (4.4%)   | 37.9 (5.9) |       |        |
| Frequency of using a foreign language |             |            | 6.85  | <.0001 |
| often                                 | 143 (29.9%) | 40.7 (4.8) |       |        |
| sometimes                             | 157 (32.8%) | 39.2 (4.9) |       |        |
| rarely                                | 143 (29.9%) | 39.1 (5.8) |       |        |
| never                                 | 36 (7.5%)   | 36.5 (6.7) |       |        |
| Sleep quality                         |             |            | 20.55 | <.0001 |
| always good                           | 44 (9.1%)   | 41.9 (4.4) |       |        |
| mostly good                           | 299 (62.2%) | 40.3 (4.7) |       |        |
| rarely good                           | 131 (27.2%) | 36.9 (6.0) |       |        |
| never good                            | 7 (1.5%)    | 34.0 (5.3) |       |        |
| Watching TV                           |             |            | 7.22  | <.0001 |
| 1 hour or less per day                | 63 (22.4%)  | 40.9 (4.8) |       |        |
| 1 – 2 hours per day                   | 127 (45.2%) | 38.3 (5.6) |       |        |
| 2 – 3 hours per day                   | 65 (23.1%)  | 40.7 (4.1) |       |        |
| more than 3 hours per day             | 26 (9.3%)   | 36.8 (5.0) |       |        |
| PC using                              |             |            | < 1   | ns.    |
| 1 hour or less per day                | 91 (46%)    | 38.9 (5.9) |       |        |
| 1 – 2 hours per day                   | 64 (32.3%)  | 39.7 (4.2) |       |        |
| 2 – 3 hours per day                   | 26 (13.1%)  | 40.0 (4.8) |       |        |
| more than 3 hours per day             | 17 (8.6%)   | 38.5 (4.8) |       |        |
| Mobile phone using                    |             |            | < 1   | ns.    |
| 1 hour or less per day                | 121 (52.6%) | 39.6 (5.1) |       |        |
| 1 – 2 hours per day                   | 69 (30%)    | 39.2 (5.9) |       |        |
| 2 – 3 hours per day                   | 21 (9.1%)   | 39.5 (5.0) |       |        |
| more than 3 hours per day             | 19 (8.3%)   | 39.2 (4.3) |       |        |
| Media general                         |             |            | 2.08  | ns.    |
| 1 hour or less per day                | 46 (11.6%)  | 38.6 (6.2) |       |        |
| 1 – 2 hours per day                   | 80 (20.2%)  | 39.8 (6.0) |       |        |
| 2 – 3 hours per day                   | 97 (24.4%)  | 40.3 (4.0) |       |        |
| more than 3 hours per day             | 174 (43.8%) | 38.8 (5.2) |       |        |
| Duration of physical activity         |             |            | 3.06  | .028   |
| 1 hour or less per week               | 46 (12.9%)  | 39.5 (4.9) |       |        |
| 1 – 2 hours per week                  | 96 (26.9%)  | 38.7 (5.4) |       |        |
| 2 – 3 hours per week                  | 59 (16.5%)  | 39.5 (5.4) |       |        |
| more than 3 hours per week            | 156 (43.7%) | 40.6 (4.9) |       |        |
| <b>Work-related parameters</b>        |             |            |       |        |
| Work amount                           |             |            | 2.01  | ns.    |
| full position (100%)                  | 217 (47.8%) | 39.7 (5.5) |       |        |
| three-quarter position (75%)          | 63 (13.9%)  | 38.0 (5.3) |       |        |
| half position (50%)                   | 57 (12.6%)  | 38.9 (4.9) |       |        |

|                               |             |             |      |      |
|-------------------------------|-------------|-------------|------|------|
| less than 50%                 | 37 (8.1%)   | 39.8 (4.9)  |      |      |
| mini job                      | 80 (17.6%)  | 40.3 (5.3)  |      |      |
| Employment sector             |             |             | 4.98 | .002 |
| industry                      | 38 (8.4%)   | 39.1 (5.5)  |      |      |
| service                       | 296 (65.2%) | 38.8 (5.6)  |      |      |
| education                     | 111 (24.4%) | 41.0 (4.4)  |      |      |
| craft                         | 9 (2%)      | 39.2 (4.6)  |      |      |
| Type of work                  |             |             | 3.28 | ns.  |
| repetitive                    | 45 (9.3%)   | 38.1 (5.3)  |      |      |
| flexible                      | 409 (84.7%) | 39.6 (5.3)  |      |      |
| Shift work                    |             |             | 1.41 | ns.  |
| no shift work (day)           | 340 (70.4%) | 39.5 (5.4)  |      |      |
| shift work without night work | 5 (1.2%)    | 38.4 (11.1) |      |      |
| shift work with night work    | 37 (8.9%)   | 39.8 (5.3)  |      |      |
| night work only               | 33 (8%)     | 37.1 (5.3)  |      |      |
| Commuting to work             |             |             | 1.04 | ns.  |
| 1 hour or less per day        | 260 (75.1%) | 39.1 (5.6)  |      |      |
| 1 – 2 hours per day           | 69 (19.9%)  | 39.2 (5.4)  |      |      |
| 2 – 3 hours per day           | 12 (3.5%)   | 41.2 (4.0)  |      |      |
| more than 3 hours per day     | 5 (1.4%)    | 42.2 (2.9)  |      |      |

<sup>a</sup>Age groups are defined as followed: middle-aged = 20 to 44 years; older = 45 years or older

**Table S2** Factor loadings and parameter estimates of the structural equation model for the whole sample

| <b>Latent factors and indicator variables</b> | <b><i>B</i></b> | <b>ci.lower</b> | <b>ci.upper</b> | <b><i>b</i></b> | <b><i>R</i><sup>2</sup></b> |
|-----------------------------------------------|-----------------|-----------------|-----------------|-----------------|-----------------------------|
| <b>Social</b>                                 |                 |                 |                 |                 |                             |
| QoLsoc                                        | 1.000           | 1.000           | 1.000           | 0.607           | 0.369                       |
| FriendsN                                      | 0.559           | 0.285           | 0.833           | 0.339           | 0.115                       |
| FriendsFreq                                   | 0.748           | 0.414           | 1.082           | 0.453           | 0.206                       |
| <b>Cognitive Functions</b>                    |                 |                 |                 |                 |                             |
| DST                                           | 1.000           | 1.000           | 1.000           | 0.722           | 0.521                       |
| LPS3                                          | 0.929           | 0.756           | 1.102           | 0.671           | 0.450                       |
| Stroop                                        | 0.773           | 0.621           | 0.926           | 0.559           | 0.312                       |
| d2                                            | 1.008           | 0.843           | 1.173           | 0.728           | 0.530                       |
| LPS7                                          | 0.670           | 0.517           | 0.822           | 0.484           | 0.234                       |
| DS                                            | 0.506           | 0.352           | 0.660           | 0.366           | 0.134                       |
| <b>Physical Fitness</b>                       |                 |                 |                 |                 |                             |
| Pmax                                          | 1.000           | 1.000           | 1.000           | 0.787           | 0.620                       |
| PWR                                           | 1.064           | 0.752           | 1.376           | 0.838           | 0.702                       |
| LPAQ                                          | 0.515           | 0.352           | 0.679           | 0.406           | 0.165                       |
| WAI                                           |                 |                 |                 |                 |                             |
| WAI1                                          | 1.000           | 1.000           | 1.000           | 0.788           | 0.622                       |
| WAI2                                          | 1.088           | 0.982           | 1.195           | 0.858           | 0.736                       |
| WAI6                                          | 0.918           | 0.763           | 1.074           | 0.724           | 0.524                       |
| WAI7                                          | 0.750           | 0.648           | 0.852           | 0.591           | 0.350                       |
| WAI3                                          | 0.493           | 0.371           | 0.615           | 0.389           | 0.151                       |
| WAI5                                          | 0.380           | 0.250           | 0.511           | 0.300           | 0.090                       |
| WAI4                                          | 0.846           | 0.736           | 0.956           | 0.667           | 0.445                       |
| <b>Regressions</b>                            |                 |                 |                 |                 |                             |
| WAI ~Fitness                                  | 0.088           | -0.022          | 0.199           | 0.088           |                             |
| WAI ~Social                                   | 0.594           | 0.300           | 0.887           | 0.457           |                             |
| WAI ~CF                                       | 0.188           | 0.063           | 0.312           | 0.172           |                             |
| <b>Covariances/ Correlations</b>              |                 |                 |                 |                 |                             |
| WAI3 ~~WAI4                                   | 0.363           | 0.271           | 0.455           | 0.528           |                             |
| Social ~~CF                                   | 0.079           | 0.013           | 0.145           | 0.181           |                             |
| Social ~~Fitness                              | 0.045           | -0.029          | 0.119           | 0.094           |                             |
| CF ~~Fitness                                  | 0.008           | -0.059          | 0.075           | 0.014           |                             |

*B* = unstandardized estimate; *b* = standardized estimate; ci = confidence interval; *R*<sup>2</sup> = R square; d2 = d2-R Test of attentional endurance; DS= Digit Span Backward; DST = Digit Substitution Test; FriendsFreq = Frequency of social contacts; FriendsN = Number of friends; LPS3 = logical reasoning; LPS7 = spatial rotation; LPAQ = Lüdenscheid Physical Activity Questionnaire; Pmax= maximum power output in watt of the Physical Work Capacity test; PWR = power-to-weight ratio of the Physical Work Capacity test; QoLsoc = WHOQoL social dimension; Stroop = Stroop Test; WAI = Work Ability Index

**Table S3** Factor loadings and parameter estimates of the configural model for middle-aged and older adults.

| Latent factors and indicator variables | Middle-aged adults |          |          |          |                       | Older adults |          |          |          |                       |
|----------------------------------------|--------------------|----------|----------|----------|-----------------------|--------------|----------|----------|----------|-----------------------|
|                                        | <i>B</i>           | ci.lower | ci.upper | <i>b</i> | <i>R</i> <sup>2</sup> | <i>B</i>     | ci.lower | ci.upper | <i>b</i> | <i>R</i> <sup>2</sup> |
| <b>Social</b>                          |                    |          |          |          |                       |              |          |          |          |                       |
| QoLsoc                                 | 1.000              | 1.000    | 1.000    | 0.678    | 0.460                 | 1.000        | 1.000    | 1.000    | 0.580    | 0.336                 |
| FriendsN                               | 0.432              | 0.068    | 0.797    | 0.289    | 0.084                 | 0.885        | 0.460    | 1.310    | 0.518    | 0.268                 |
| FriendsFreq                            | 0.567              | 0.171    | 0.964    | 0.379    | 0.144                 | 0.749        | 0.309    | 1.190    | 0.439    | 0.193                 |
| <b>Cognitive Functions</b>             |                    |          |          |          |                       |              |          |          |          |                       |
| DST                                    | 1.000              | 1.000    | 1.000    | 0.622    | 0.387                 | 1.000        | 1.000    | 1.000    | 0.677    | 0.458                 |
| LPS3                                   | 0.922              | 0.632    | 1.213    | 0.596    | 0.356                 | 1.012        | 0.707    | 1.317    | 0.630    | 0.397                 |
| Stroop                                 | 0.727              | 0.482    | 0.972    | 0.462    | 0.213                 | 0.809        | 0.546    | 1.072    | 0.495    | 0.245                 |
| d2                                     | 1.184              | 0.856    | 1.513    | 0.670    | 0.449                 | 0.956        | 0.722    | 1.190    | 0.696    | 0.485                 |
| LPS7                                   | 0.646              | 0.379    | 0.914    | 0.379    | 0.144                 | 0.827        | 0.594    | 1.060    | 0.510    | 0.260                 |
| DS                                     | 0.629              | 0.348    | 0.909    | 0.360    | 0.130                 | 0.625        | 0.350    | 0.900    | 0.383    | 0.146                 |
| <b>Physical Fitness</b>                |                    |          |          |          |                       |              |          |          |          |                       |
| Pmax                                   | 1.000              | 1.000    | 1.000    | 0.870    | 0.757                 | 1.000        | 1.000    | 1.000    | 0.816    | 0.666                 |
| PWR                                    | 0.798              | 0.492    | 1.104    | 0.691    | 0.478                 | 1.089        | 0.653    | 1.524    | 0.877    | 0.770                 |
| LPAQ                                   | 0.520              | 0.264    | 0.775    | 0.438    | 0.192                 | 0.446        | 0.215    | 0.676    | 0.371    | 0.138                 |
| <b>WAI</b>                             |                    |          |          |          |                       |              |          |          |          |                       |
| WAI1                                   | 1.000              | 1.000    | 1.000    | 0.771    | 0.594                 | 1.000        | 1.000    | 1.000    | 0.805    | 0.648                 |
| WAI2                                   | 1.097              | 0.968    | 1.226    | 0.846    | 0.715                 | 1.045        | 0.903    | 1.187    | 0.841    | 0.707                 |
| WAI6                                   | 0.866              | 0.634    | 1.098    | 0.668    | 0.446                 | 0.928        | 0.714    | 1.142    | 0.747    | 0.558                 |
| WAI7                                   | 0.738              | 0.598    | 0.879    | 0.569    | 0.324                 | 0.932        | 0.804    | 1.059    | 0.750    | 0.562                 |
| WAI3                                   | 0.479              | 0.305    | 0.653    | 0.369    | 0.136                 | 0.405        | 0.229    | 0.581    | 0.326    | 0.106                 |
| WAI5                                   | 0.454              | 0.287    | 0.621    | 0.350    | 0.122                 | 0.376        | 0.198    | 0.554    | 0.303    | 0.092                 |
| WAI4                                   | 0.963              | 0.795    | 1.131    | 0.742    | 0.551                 | 0.736        | 0.593    | 0.879    | 0.592    | 0.351                 |
| <b>Regressions</b>                     |                    |          |          |          |                       |              |          |          |          |                       |
| WAI ~Fitness                           | 0.238              | 0.074    | 0.403    | 0.258    |                       | -0.043       | -0.196   | 0.109    | -0.045   |                       |
| WAI ~Social                            | 0.459              | 0.070    | 0.848    | 0.398    |                       | 0.648        | 0.282    | 1.013    | 0.471    |                       |
| WAI ~CF                                | 0.194              | -0.058   | 0.447    | 0.144    |                       | 0.184        | -0.044   | 0.412    | 0.138    |                       |
| <b>Covariances/Correlations</b>        |                    |          |          |          |                       |              |          |          |          |                       |
| WAI3 ~~WAI4                            | 0.275              | 0.122    | 0.429    | 0.442    |                       | 0.388        | 0.257    | 0.518    | 0.509    |                       |
| Social ~~CF                            | 0.107              | 0.019    | 0.195    | 0.280    |                       | 0.001        | -0.068   | 0.071    | 0.004    |                       |
| Social ~~Fitness                       | 0.040              | -0.079   | 0.160    | 0.072    |                       | 0.065        | -0.038   | 0.169    | 0.134    |                       |
| CF ~~Fitness                           | -0.075             | -0.162   | 0.011    | -0.158   |                       | 0.132        | 0.035    | 0.229    | 0.261    |                       |

*B* = unstandardized estimate; *b* = standardized estimate; ci = confidence interval; *R*<sup>2</sup> = R square; d2 = d2-R Test of attentional endurance; DS= Digit Span Backward; DST = Digit Substitution Test; FriendsFreq = Frequency of social contacts; FriendsN = Number of friends; LPS3 = logical reasoning; LPS7 = spatial rotation; LPAQ = Lüdenschied Physical Activity Questionnaire; Pmax= maximum power output in watt of the Physical Work Capacity test; PWR = power-to-weight ratio of the Physical Work Capacity test; QoLsoc = WHOQoL social dimension; Stroop = Stroop Test; WAI = Work Ability Index

**Table S4** Factor loadings and parameter estimates of the metric model for middle-aged and older adults. Factor loadings are constrained across groups.

| Latent factors and indicator variables | Pooled estimates |          |          | Middle-aged adults |                       | Older adults |                       |          |
|----------------------------------------|------------------|----------|----------|--------------------|-----------------------|--------------|-----------------------|----------|
|                                        | <i>B</i>         | ci.lower | ci.upper | <i>b</i>           | <i>R</i> <sup>2</sup> | <i>b</i>     | <i>R</i> <sup>2</sup> |          |
| <b>Social</b>                          |                  |          |          |                    |                       |              |                       |          |
| QoLsoc                                 | 1.000            | 1.000    | 1.000    | 0.596              | 0.355                 | 0.652        | 0.424                 |          |
| FriendsN                               | 0.668            | 0.393    | 0.943    | 0.392              | 0.154                 | 0.440        | 0.193                 |          |
| FriendsFreq                            | 0.649            | 0.355    | 0.943    | 0.381              | 0.145                 | 0.427        | 0.183                 |          |
| <b>Cognitive Functions</b>             |                  |          |          |                    |                       |              |                       |          |
| DST                                    | 1.000            | 1.000    | 1.000    | 0.615              | 0.378                 | 0.678        | 0.460                 |          |
| LPS3                                   | 0.973            | 0.761    | 1.186    | 0.622              | 0.387                 | 0.608        | 0.369                 |          |
| Stroop                                 | 0.765            | 0.587    | 0.943    | 0.480              | 0.230                 | 0.469        | 0.220                 |          |
| d2                                     | 1.047            | 0.847    | 1.247    | 0.586              | 0.343                 | 0.765        | 0.586                 |          |
| LPS7                                   | 0.748            | 0.571    | 0.925    | 0.433              | 0.188                 | 0.462        | 0.214                 |          |
| DS                                     | 0.634            | 0.436    | 0.832    | 0.359              | 0.129                 | 0.389        | 0.151                 |          |
| <b>Physical Fitness</b>                |                  |          |          |                    |                       |              |                       |          |
| Pmax                                   | 1.000            | 1.000    | 1.000    | 0.843              | 0.711                 | 0.859        | 0.738                 |          |
| PWR                                    | 0.920            | 0.664    | 1.175    | 0.772              | 0.597                 | 0.780        | 0.608                 |          |
| LPAQ                                   | 0.472            | 0.301    | 0.642    | 0.385              | 0.148                 | 0.413        | 0.171                 |          |
| <b>WAI</b>                             |                  |          |          |                    |                       |              |                       |          |
| WAI1                                   | 1.000            | 1.000    | 1.000    | 0.776              | 0.602                 | 0.795        | 0.633                 |          |
| WAI2                                   | 1.081            | 0.981    | 1.182    | 0.839              | 0.704                 | 0.860        | 0.740                 |          |
| WAI6                                   | 0.905            | 0.748    | 1.063    | 0.703              | 0.494                 | 0.720        | 0.519                 |          |
| WAI7                                   | 0.848            | 0.754    | 0.941    | 0.658              | 0.433                 | 0.674        | 0.455                 |          |
| WAI3                                   | 0.438            | 0.314    | 0.562    | 0.340              | 0.116                 | 0.349        | 0.122                 |          |
| WAI5                                   | 0.414            | 0.291    | 0.536    | 0.321              | 0.103                 | 0.329        | 0.108                 |          |
| WAI4                                   | 0.840            | 0.730    | 0.950    | 0.652              | 0.425                 | 0.668        | 0.447                 |          |
| <b>Regressions</b>                     |                  |          |          |                    |                       |              |                       |          |
|                                        | <i>B</i>         | ci.lower | ci.upper | <i>b</i>           | <i>B</i>              | ci.lower     | ci.upper              | <i>b</i> |
| WAI ~Fitness                           | 0.223            | 0.061    | 0.385    | 0.232              | -0.032                | -0.175       | 0.112                 | -0.035   |
| WAI ~Social                            | 0.556            | 0.173    | 0.939    | 0.421              | 0.558                 | 0.246        | 0.870                 | 0.462    |
| WAI ~CF                                | 0.196            | -0.053   | 0.445    | 0.143              | 0.176                 | -0.044       | 0.396                 | 0.134    |
| <b>Covariances/Correlations</b>        |                  |          |          |                    |                       |              |                       |          |
| WAI3 ~~WAI4                            | 0.328            | 0.183    | 0.472    | 0.460              | 0.348                 | 0.219        | 0.476                 | 0.499    |
| Social ~~CF                            | 0.084            | 0.000    | 0.168    | 0.253              | 0.001                 | -0.076       | 0.077                 | 0.002    |
| Social ~~Fitness                       | 0.045            | -0.061   | 0.150    | 0.094              | 0.074                 | -0.046       | 0.194                 | 0.128    |
| CF ~~Fitness                           | -0.068           | -0.149   | 0.013    | -0.148             | 0.138                 | 0.038        | 0.238                 | 0.259    |

*B* = unstandardized estimate; *b* = standardized estimate; ci = confidence interval; *R*<sup>2</sup> = R square; d2 = d2-R Test of attentional endurance; DS= Digit Span Backward; DST = Digit Substitution Test; FriendsFreq = Frequency of social contacts; FriendsN = Number of friends; LPS3 = logical reasoning; LPS7 = spatial rotation; LPAQ = Lüdenscheid Physical Activity Questionnaire; Pmax= maximum power output in watt of the Physical Work Capacity test; PWR = power-to-weight ratio of the Physical Work Capacity test; QoLsoc = WHOQoL social dimension; Stroop = Stroop Test; WAI = Work Ability Index
